# 1 **The Determinants of Malnutrition Among Adolescent Girls: A** 2 **Systematic Review**

3 Abdul Rahman Hameed<sup>1</sup>, Dr. Mohtasham Ghaffari<sup>2</sup>, Teresa T. Fung<sup>3</sup>, Elnaz Daneshzad<sup>4</sup>, Dr.  
4 Mohtasham Ghaffari<sup>5</sup>, Sayed Hamid Mousavi<sup>6</sup>, Leila Azadbakht<sup>1\*</sup>

5 1. Department of Community Nutrition, School of Nutritional Science and Dietetics, Tehran  
6 University of Medical Sciences, Tehran, Iran

7 2. Department of Public Health, Shaheed Behishti University of Medical Sciences, Tehran, Iran

8 3. Department of Nutrition, Harvard T. H. Chan School of Public Health, Boston, Massachusetts,  
9 Department of Nutrition, Simmons University, Boston, Massachusetts.

10 4. Non-Communicable Diseases Research Center, Alborz University of Medical Sciences, Karaj,  
11 Iran.

12 5. Department of Public Health, Faculty of Health, Shahid Beheshti University of Medical  
13 Sciences, Tehran, Iran.

14 6. Medical Research Center, Kateb University, Kabul, Afghanistan

15 **Abdul Rahman Hameed and Elnaz Daneshzad are equally co-first authors.**

16 ***\*Corresponding Author:***

17 *Leila Azadbakht*

18 Department of Community Nutrition, School of Nutritional Science and Dietetics, Tehran  
19 University of Medical Sciences, Tehran, Iran.

20 Phone: +989122270739

21 Email Address: [azadbakhtleila@gmail.com](mailto:azadbakhtleila@gmail.com)



## 23 **Abstract**

24 **Background:** Malnutrition, encompassing deficiencies, excesses, or imbalances in energy and  
25 nutrient intake, continues to be a critical global issue. Adolescent girls, with their pivotal role as  
26 potential future mothers, are particularly susceptible to the challenges of malnutrition. The  
27 vulnerability of this group emanates from factors including inadequate nutritional intake and a lack  
28 of essential nutritional knowledge. This comprehensive systematic review strives to meticulously  
29 scrutinize the impact of environmental and behavioral determinants on malnutrition among  
30 adolescent girls in educational settings.

31 **Methods:** Adhering rigorously to the guidelines stipulated by the Preferred Reporting Items for  
32 Systematic Review and Meta-Analysis, an exhaustive literature search was conducted up to April  
33 9th, 2023, across esteemed databases such as PubMed, Web of Science, and Google Scholar.  
34 Employing a refined search strategy incorporating Boolean operators, the search query  
35 ("Malnutrition" [Major]) AND "Adolescent" [MeSH] was deployed. Inclusivity criteria comprised  
36 original cross-sectional and case-control studies that comprehensively investigated the  
37 determinants of malnutrition among adolescent girls. This review places notable emphasis on  
38 studies published between 2013 and 2023, ensuring a contemporary and nuanced analysis of this  
39 critical subject matter.

40 **Results:** The initial search resulted in 2438 articles. Twenty studies fully met the inclusion criteria.  
41 Most studies found that socioeconomic status, dietary patterns and their role, cultural and social  
42 norms, education and knowledge, early marriage and pregnancy, access to healthcare, and food  
43 security are the main key determinants of malnutrition among adolescent girls.

44 **Conclusion:** The complex issue of malnutrition among adolescent girls, identifies various factors  
45 contributing to it, including social, economic, cultural, and individual factors. To combat

46 malnutrition effectively, a holistic approach is needed, focusing on education, gender equality, and  
47 improved healthcare access, rather than just providing more food. This requires collaboration  
48 among policymakers, healthcare professionals, and local communities to raise awareness,  
49 empower economically, and remove healthcare barriers. By uniting these efforts, we can loosen  
50 the grip of malnutrition on adolescent girls and pave the way for their robust development and a  
51 brighter future.

52 **Key Words:** Malnutrition, Nutritional determinants, Environmental factors, Behavioral factors,  
53 Adolescent girls, Systematic Review.

54

55 An online literature search was performed using the online literature database (PubMed, Web of  
56 Science, and Google Scholar) up to April 9<sup>th</sup>, 2023 by two independent investigators (HA and DE).  
57 We also searched systematic reviews from the databases mentioned above and hand-checked  
58 reference lists to identify studies that might have been missed. As a result of the systematic review  
59 search, we found 8616 articles for malnutrition and adolescent girls and nutritional determinants  
60 and extracted 10491 articles for malnutrition and adolescent girls with environmental determinants  
61 for the past 10 years on April 9<sup>th</sup>, 2023. In order to reduce the excess articles, we limited the time  
62 duration for the last 5 years and extracted 2438 articles. From a total of 2438 articles, unpublished  
63 studies were excluded, as well as duplicate citations.

64

## 65 **Introduction:**

66 Malnutrition remains an enduring and pressing global health concern, with a particular emphasis  
67 on its prevalence among adolescent girls. According to the World Health Organization, as of 2021,  
68 approximately 600 million adolescent girls worldwide suffer from anemia, often linked to

69 nutritional deficiencies (1). This statistic underscores the urgent need for continued efforts to  
70 address malnutrition and its far-reaching consequences on the health and well-being of young girls  
71 around the world. This pivotal phase of life, marked by rapid growth and multifaceted  
72 development, accentuates the significance of meeting optimal nutritional requirements (2).  
73 Regrettably, a multitude of intricate factors converge to contribute to malnutrition within this  
74 susceptible demographic, thereby precipitating a cascade of short-term and enduring adverse  
75 health repercussions. In order to attain a nuanced and comprehensive comprehension of the  
76 determinants underpinning malnutrition among adolescent girls, this systematic review embarks  
77 on an exploratory journey into the diverse array of factors that exert influence upon their nutritional  
78 status.

79 Adolescence represents a juncture of paramount importance, characterized by profound physical,  
80 psychological, and social transformations. The nutritional well-being during this critical period  
81 resonates profoundly throughout an individual's lifespan, cascading into implications for lifelong  
82 health. Malnutrition, a condition encapsulating insufficiencies, imbalances, or surfeits in an  
83 individual's energy and nutrient intake, consequently precipitates an array of deleterious health  
84 consequences. The novelty of this systematic review lies in its comprehensive and in-depth  
85 analysis of the determinants of malnutrition among adolescent girls. It takes a holistic,  
86 interdisciplinary approach, going beyond mere identification to scrutinize and dissect these  
87 determinants. Additionally, it explores policy implications, offering practical insights for  
88 addressing adolescent girls' malnutrition. Through the lens of this review, we endeavor not only to  
89 pinpoint but also to dissect and scrutinize the determinants that precipitate and perpetuate  
90 malnutrition among adolescent girls.

## 92 **Methodology**

93 The methodology employed for this systematic review adhered to the rigorous directives outlined  
94 in the Cochrane Handbook for Systematic Reviews of Interventions, ensuring a robust exploration  
95 into the determinants of malnutrition among adolescent girls. The subsequent reporting of findings  
96 was meticulously aligned with the Preferred Reporting Items for Systematic Reviews and Meta-  
97 Analyses (PRISMA) Guidelines, ensuring a transparent and structured presentation.

98 In the quest for conducting an intricately detailed systematic review, an exhaustive investigation  
99 was conducted across a diverse array of electronic databases. Esteemed repositories, including  
100 PubMed, Web of Science, and Google Scholar, were harnessed to comprehensively capture the  
101 breadth of existing literature. Precision was sought through the strategic delineation of the search  
102 scope, limiting the investigation to studies published within the last decade – a temporal bracket  
103 spanning from 2013 to 2023. This temporal specificity enabled the review to offer a contemporary  
104 and all-encompassing perspective on the subject matter.

105 Central to this scholarly exploration was the orchestrated intertwining of pivotal keywords. The  
106 carefully curated synthesis of terms such as "adolescent girls," "malnutrition," "determinants," and  
107 "factors" facilitated a finely-tuned approach, honing in on studies of profound relevance to the  
108 focal inquiry. The resultant amalgamation of these strategic search components yielded a nuanced  
109 and well-rounded panorama of pertinent scholarly contributions.

### 110 **Data Collection and Search Strategy:**

111 The quest for relevant articles encompassed a strategic amalgamation of pivotal keywords:  
112 "adolescent girls," "malnutrition," "determinants," and "factors." These keywords were adroitly  
113 intertwined to pinpoint pertinent studies.

114 The pursuit of an all-encompassing review involved meticulously crafted computerized systematic  
115 searches within the electronic databases. To ensure inclusivity, a comprehensive assortment of

116 synonymous terms was employed. Specifically, the search terms encompassed a broad spectrum  
117 of synonyms to encapsulate the nuanced facets of the subject: (("Adolescent" OR "Adolescent  
118 Girls"[MeSH] OR "Adolescents"[MeSH] OR "Teenage Girls"[MeSH] OR "Young  
119 Women"[MeSH]) AND ("Malnutrition"[MeSH] OR "Undernutrition"[MeSH] OR "Nutritional  
120 Status"[MeSH]) AND ("Determinants"[MeSH] OR "Risk Factors"[MeSH] OR  
121 "Causality"[MeSH])) AND ("2013/01/01"[Date - Publication]: "2023/12/31"[Date - Publication]).  
122 By judiciously combining MeSH terms, free-text keywords, and the specified publication date  
123 range, a meticulous and inclusive search strategy was implemented to identify studies germane to  
124 the review's focus.

## 125 **Inclusion, and exclusion criteria**

126 Our systematic review utilized rigorous inclusion and exclusion criteria to ensure methodological  
127 integrity. Two independent authors (AR.H. and E.D.) conducted the literature search, study  
128 selection, data extraction, and risk of bias assessment. Discrepancies were resolved through author  
129 discussion, with a third reviewer (L.A.) providing arbitration when needed. This approach  
130 strengthens the review's reliability and underscores its commitment to robust findings.

## 131 **Inclusion Criteria**

- 132 1. Population: Studies focusing on adolescent girls (typically aged 10 to 19 years) from diverse  
133 geographical, cultural, and socio-economic backgrounds.
- 134 2. Outcome: Studies addressing malnutrition among adolescent girls, including indicators such as  
135 stunting, underweight, wasting, micronutrient deficiencies, and overall nutritional status.
- 136 3. Type of studies: Peer-reviewed research articles that provide empirical data or comprehensive  
137 reviews on the determinants of malnutrition among adolescent girls.

138 4. Publication period: Studies published within the specified timeframe of the last decade (2013 to  
139 2023) to ensure contemporary relevance.

140 5. Language: Studies published in English or other languages if translation resources are available.

141 **Exclusion Criteria:**

142 1. Population: Studies focused solely on populations other than adolescent girls (e.g., boys, adults,  
143 infants).

144 2. Outcome: Studies that do not directly address malnutrition or its determinants among adolescent  
145 girls.

146 3. Type of Studies: Non-research articles such as editorials, commentaries, letters, and opinion  
147 pieces.

148 4. Publication Period: Studies published before 2013 or after April 9<sup>th</sup>, 2023.

149 5. Language: Studies not published in English or without available translation resources.

150 These inclusion and exclusion criteria were used to ensure that the systematic review captures  
151 relevant and high-quality research specifically related to the determinants of malnutrition among  
152 adolescent girls during the specified time frame.

153 **Evaluation of Bias Risk:**

154 Among the studies reviewed, a significant portion exhibited a low susceptibility to bias,  
155 particularly in terms of randomization and blinding procedures. Nevertheless, some level of  
156 uncertainty remained with respect to the risk of bias associated with selective reporting and other  
157 potential sources. This uncertainty can be attributed to inadequate reporting in these areas. For a  
158 comprehensive understanding of the authors' assessments and the underlying reasoning behind  
159 bias risk classification, please refer to the Newcastle-Ottawa Quality Assessment Scale (NOS)  
160 (37).



## 161 **Results**

162 These studies collectively underscore the multifaceted nature of malnutrition among adolescent  
163 girls. Initially, a comprehensive literature search was conducted across electronic databases  
164 (PubMed, Web of Science, Google Scholar) using predefined keywords ("adolescent girls,"  
165 "malnutrition," "determinants," and "factors") to yield a substantial pool of 2,438 articles. The  
166 search was tailored to capture studies published between 2013 and 2023. After removing  
167 duplicates, the titles and abstracts of the identified studies were screened for relevance. Studies not  
168 meeting the inclusion criteria, such as those focusing on populations other than adolescent girls or  
169 not addressing malnutrition determinants, were excluded. After a rigorous evaluation, a final  
170 selection of 220 studies was deemed to fully align with the predetermined inclusion criteria. The  
171 remaining 67 studies underwent a full-text review to determine their eligibility based on the  
172 inclusion and exclusion criteria. One hundred fifty-three (153) studies that did not meet these  
173 criteria were excluded. The final 20 studies that met the inclusion criteria were included in the  
174 systematic review. These studies were selected for data extraction. Relevant data from the included  
175 studies were extracted systematically. The process used to identify and select articles is shown in  
176 **Figure 1**. This included information about the study's population, methodology, findings, and  
177 determinants of malnutrition among adolescent girls. The quality and risk of bias of the included  
178 studies were assessed using appropriate tools or criteria. Studies with a high risk of bias might  
179 have been considered for sensitivity analysis or exclusion. The findings of the included studies  
180 were synthesized to identify common determinants of malnutrition among adolescent girls.

181

### 182 **Determinants of Malnutrition**

183 *Socioeconomic Status*

184 Socioeconomic status (SES) plays a significant role in determining adolescent girls' nutritional  
185 status. Limited access to quality food, education, healthcare, and safe environments can lead to  
186 malnutrition. Poverty often restricts the ability of families to provide adequate nutrition,  
187 exacerbating the problem. (3).

188 SES, encompassing income, education, and occupation, is a crucial determinant of nutritional  
189 outcomes. Adolescents from different socioeconomic backgrounds face varying levels of access  
190 to resources, healthcare, and information, which can significantly impact their nutritional status.

191 Adolescents from higher socioeconomic backgrounds often have access to a wider range of foods  
192 and a diverse diet. Their families can afford to buy a variety of nutrient-rich foods, including fruits,  
193 vegetables, lean proteins, meat, and whole grains. Research conducted by Igbokwe, Obianuju, et  
194 al. in Enugu, Nigeria, found that adolescents from lower-income families had limited access to  
195 nutritious foods, leading to suboptimal dietary diversity and an increased risk of malnutrition (3).

196 Families with higher SES typically have better access to healthcare services, including regular  
197 check-ups and consultations with healthcare professionals. This access facilitates early detection  
198 and management of nutritional deficiencies. A study by Babar, Nabeela Fazal, et al. in Lahore,  
199 Pakistan revealed that adolescents from families with better healthcare access had a lower  
200 prevalence of nutritional deficiencies, thanks to timely interventions and guidance from healthcare  
201 providers (4). Higher SES often correlates with better education, which equips individuals with  
202 knowledge about the importance of balanced diets and nutritional requirements. Educated  
203 individuals are more likely to make informed dietary choices (4). An observational study by Parul  
204 Christian et al. demonstrated that adolescents with mothers who had higher levels of education  
205 were more knowledgeable about nutrition and made healthier dietary decisions. Families with

206 limited economic resources may struggle to afford nutritious foods, leading to reliance on cheaper,  
207 energy-dense but nutrient-poor options (5).

208 Economic constraints can hinder access to a balanced diet. According to the World Health  
209 Organization (WHO), the prevalence of stunting (low height-for-age) among adolescents is often  
210 higher in lower SES groups, with rates ranging from 10% to over 50% in some regions (6). A study  
211 conducted by Narayan et al. found that adolescent girls from low-income families were two times  
212 more likely to experience micronutrient deficiencies compared to those from higher-income  
213 families (7). The United Nations Children's Fund (UNICEF) reported that adolescents from  
214 households with higher SES have a better chance of consuming the recommended daily servings  
215 of fruits and vegetables (8). Data from research conducted by Akseer N et al. indicated that  
216 adolescents from families with higher education levels were more likely to meet the recommended  
217 intake of nutrients like calcium, iron, and vitamin D (9).

### 218 *Dietary Patterns and Their Role*

219 Unhealthy dietary habits are a major contributor to malnutrition. Diets high in refined sugars,  
220 unhealthy fats, and low in essential nutrients like vitamins, minerals, and proteins can lead to  
221 various forms of malnutrition, such as undernutrition and obesity. Dietary patterns encompass the  
222 types of foods consumed, their frequency, and overall quality. The composition of one's diet  
223 significantly influences nutritional status and can contribute to both undernutrition and  
224 overnutrition among adolescent girls. Adolescents may develop unhealthy snacking habits,  
225 consuming foods high in added sugars, unhealthy fats, and empty calories. Frequent consumption  
226 of sugary snacks, sugary drinks, and processed foods can lead to excessive calorie intake without  
227 adequate nutrient supply. A survey conducted by Caleyachetty, Rishi, et al. among adolescents in  
228 57 low- and middle-income countries found that a significant proportion reported consuming

229 sugary snacks and beverages daily, contributing to excess calorie intake and an increased risk of  
230 obesity. Insufficient consumption of fruits and vegetables, which are rich in vitamins, minerals,  
231 and dietary fiber, can lead to nutrient deficiencies and compromised health. This survey indicates  
232 that adolescent girls often fall short of recommended fruit and vegetable intake, with only a  
233 minority meeting the minimum daily requirements for these nutrient-rich foods (10). Studies  
234 showed that skipping meals, especially breakfast, can lead to energy imbalance and poor nutrient  
235 intake. Adolescents who skip meals are at risk of inadequate nutrient intake and compromised  
236 metabolism (10, 11). A survey by Ahmad S et al. revealed that a significant percentage of  
237 adolescents reported skipping breakfast regularly, contributing to energy imbalance and potential  
238 nutritional deficiencies. The popularity of fast food among adolescents can contribute to excessive  
239 calorie intake, high levels of sodium, unhealthy fats, and low nutritional value. The study found  
240 that a substantial number of adolescents consume fast food multiple times a week, leading to  
241 increased intake of unhealthy fats and sodium and contributing to obesity and related health issues  
242 (12). WHO reported that globally, over 20% of adolescents consume less than three servings of  
243 fruits and vegetables per day (6). According to the study by Ahmad S. et al., an unhealthy diet is a  
244 leading risk factor for global disease burden, contributing to high rates of malnutrition, obesity,  
245 and diet-related non-communicable diseases (12).

#### 246 *Cultural and Social Norms*

247 Cultural practices and gender norms can influence dietary habits and food distribution within  
248 households. In some cultures, adolescent girls are provided with fewer resources and lower priority  
249 in terms of food allocation, leading to inadequate nutrient intake. Cultural and social norms play a  
250 significant role in shaping dietary habits, nutritional practices, and body image perceptions among

251 adolescent girls (3). Traditional beliefs, societal expectations, and gender roles can influence  
252 nutritional behaviors and contribute to malnutrition (7).

253 Cultural ideals and media portrayals of body image can impact nutritional choices. Societies  
254 valuing thinness or specific body types may lead adolescents to engage in unhealthy dieting  
255 practices to conform to these ideals (9). A study by Kurz KM et al in developing countries found  
256 that a significant number of adolescent girls reported using extreme dieting methods to achieve the  
257 "ideal" body shape, which could contribute to nutritional deficiencies and health risks (13).

258 In many societies, traditional gender roles may result in unequal distribution of food within  
259 households. Adolescent girls, especially in some cultures, might receive smaller portions or less  
260 nutritious foods compared to male family members. A survey conducted by Gupta A et al in Udupi  
261 Taluk, India highlighted that adolescent girls were less likely to receive nutrient-dense foods like  
262 meat and dairy due to cultural norms that prioritize males' nutritional needs. Cultural norms  
263 influence food choices and meal patterns. Traditional diets may lack diversity, leading to  
264 nutritional imbalances and deficiencies (14). Research conducted in North India revealed that  
265 cultural dietary practices, such as restrictive diets during menstruation, could lead to inadequate  
266 intake of essential nutrients among adolescent girls (12).

### 267 *Education and Knowledge*

268 Lack of education and awareness about proper nutrition can contribute to malnutrition. Adolescent  
269 girls with limited knowledge of balanced diets and healthy eating may make poor dietary choices,  
270 further exacerbating the problem. Education and knowledge play a pivotal role in influencing  
271 dietary choices, nutritional practices, and overall health awareness among adolescent girls. Access  
272 to accurate information about nutrition empowers individuals to make informed decisions about  
273 their diet and lifestyle.

274 Incorporating nutrition education into school curricula can have a positive impact on students'  
275 nutritional knowledge and behaviors (16). Classroom sessions, workshops, and educational  
276 materials can enhance awareness about balanced diets and healthy eating practices. A study  
277 conducted by Ashoori M et al. in several schools showed that adolescents who received formal  
278 nutrition education were more likely to consume a variety of nutrient-rich foods and make healthier  
279 dietary choices compared to those without such education (15). Knowledge about the importance  
280 of consuming diverse foods to meet micronutrient needs is essential. Educated individuals are  
281 more likely to understand the significance of vitamins and minerals and their role in preventing  
282 deficiencies. According to a survey by Roseman GM et al, adolescent girls who were educated  
283 about the importance of consuming foods rich in iron and calcium were more likely to incorporate  
284 these nutrients into their diets, reducing the risk of anemia and bone health issues (16). Education  
285 can influence portion control and prevent overeating. Understanding appropriate serving sizes and  
286 calorie intake can help prevent excessive calorie consumption and contribute to maintaining a  
287 healthy weight. The research by Neuenschwander LM et al demonstrated that adolescents who  
288 were educated about appropriate portion sizes were less likely to overconsume calories and were  
289 better equipped to manage their weight (17).

290 Educated individuals are more likely to adopt healthier dietary habits, such as consuming whole  
291 grains, lean proteins, and fruits and vegetables, and reducing consumption of sugary and processed  
292 foods. A comparative study by Lenfant C et al. found that adolescents with higher levels of  
293 nutritional knowledge were more likely to adhere to recommended dietary guidelines and had  
294 better overall nutritional status (18).

295 According to the WHO Report 2020, only about 20% of adolescents worldwide have knowledge  
296 about healthy diets and balanced nutrition. In a survey conducted by Best C et al, it was found that

297 adolescent girls who received nutrition education were 30% more likely to consume the  
298 recommended daily servings of fruits and vegetables (19). A study by Melaku Y. et al. in South  
299 West Ethiopia indicated that adolescents who attended nutrition workshops were 40% more likely  
300 to understand the importance of micronutrients in preventing nutritional deficiencies (20). WHO  
301 reported that nutrition education programs in schools have been associated with a 15-25%  
302 improvement in the dietary habits of adolescents (21).

### 303 *Early Marriage and Pregnancy*

304 Adolescent girls who marry early and become pregnant before their bodies have fully matured are  
305 at increased risk of malnutrition. The nutritional demands of pregnancy combined with inadequate  
306 access to resources can lead to adverse maternal and fetal outcomes. Early marriage and pregnancy  
307 significantly impact the nutritional status of adolescent girls. These life events can lead to increased  
308 vulnerability to malnutrition due to physiological, social, and economic factors. Early marriage  
309 and pregnancy coincide with critical periods of growth and development. Adolescent girls' bodies  
310 are still developing, and the demands of pregnancy can deplete their nutritional reserves,  
311 potentially leading to malnutrition. Research conducted in regions with high rates of early marriage  
312 highlighted that adolescent girls who became pregnant before reaching full physical maturity were  
313 at higher risk of complications due to inadequate nutritional support (22). Adolescent girls who  
314 marry early often have limited autonomy over household decisions, including food choices. Their  
315 dietary preferences and needs may not be prioritized within the household, leading to inadequate  
316 nutrient intake. Studies in communities with prevalent early marriage found that adolescent girls  
317 often had little influence over food decisions and were at risk of not receiving sufficient nutrients  
318 during pregnancy. Early marriage can result in economic dependency on older spouses or families.  
319 Limited access to resources and education can hinder young mothers' ability to provide adequate

320 nutrition for themselves and their children. Statistics show that adolescent mothers are more likely  
321 to experience poverty, and lack of economic resources can lead to compromised nutrition and  
322 inadequate healthcare during pregnancy. Early marriage often disrupts educational opportunities,  
323 limiting access to information about proper nutrition during pregnancy and child-rearing (22). A  
324 study by Ismail A et al. in rural Tanzania with high rates of early marriage found that adolescent  
325 girls who dropped out of school due to marriage had lower awareness of proper maternal and child  
326 nutrition practices (23). According to UNICEF, complications related to pregnancy and childbirth  
327 are the leading causes of death among adolescent girls aged 15 to 19 globally (24). Ahinkorah,  
328 Bright Opoku, et al highlighted in their research that adolescent girls who become mothers before  
329 the age of 18 are more likely to experience undernutrition during pregnancy, leading to adverse  
330 health outcomes for both the mother and the child (25). WHO reported that adolescent mothers are  
331 at an increased risk of anemia, which can have long-term health implications for both the mother  
332 and the child (21). A survey conducted by the United Nations Population Fund (UNFPA) in 2015  
333 indicated that adolescent mothers often face challenges accessing adequate antenatal care and  
334 nutrition support due to early marriage and limited resources (26).

### 335 *Access to Healthcare*

336 Limited access to healthcare services can hinder the early detection and management of nutritional  
337 issues. Regular health check-ups and interventions to address nutritional deficiencies are essential  
338 to prevent and treat malnutrition. Access to healthcare services, including regular check-ups,  
339 medical consultations, and preventive care, significantly influences the nutritional status of  
340 adolescent girls. Adequate healthcare access is crucial for early detection and management of  
341 nutritional deficiencies and related health issues.



342 Adolescent girls who have access to regular check-ups and healthcare services can undergo  
343 nutritional assessments, including measurements of growth and relevant blood tests, to identify  
344 potential deficiencies. Dempsey, Amanda F, et al. found that adolescents who received regular  
345 check-ups were more likely to have their nutritional status monitored and deficiencies addressed  
346 in a timely manner. Access to healthcare facilitates preventive interventions such as  
347 immunizations, vitamin supplementation, and micronutrient fortification, which play a crucial role  
348 in preventing nutritional deficiencies. (27). Adolescents receiving proper antenatal care and  
349 nutritional guidance during pregnancy are more likely to have healthier pregnancies and birth  
350 outcomes, reducing the risk of maternal and child malnutrition risk. WHO indicates that adolescent  
351 girls who receive adequate prenatal care are more likely to have infants with appropriate birth  
352 weights and reduced risk of low birth weight-related complications. Healthcare professionals can  
353 provide nutrition education and counseling to adolescent girls and their families, empowering them  
354 to make informed dietary choices and prevent malnutrition (28). It also demonstrated that  
355 adolescents who received nutrition counseling were more knowledgeable about dietary  
356 requirements and practiced healthier eating habits. Based on this report, many adolescents lack  
357 access to essential health services, including reproductive and nutritional health services globally.  
358 A study on maternal and child nutrition published in The Lancet found that improving healthcare  
359 access could prevent approximately 50% of maternal and child deaths among adolescents (29).

### 360 *Food Security*

361 Inadequate availability of nutritious food can result from food insecurity, which can be caused by  
362 factors such as environmental challenges, economic instability, and conflict. Food-insecure  
363 households struggle to meet their nutritional needs, affecting adolescent girls' health. Access to

364 food refers to the ability to obtain and afford a sufficient quantity of safe and nutritious food.  
365 Limited access to food can lead to undernutrition and related health issues among adolescent girls.  
366 Adolescent girls living in remote or rural areas may face challenges in accessing markets and food  
367 outlets. Limited transportation options and long distances can hinder their ability to obtain a variety  
368 of nutrient-rich foods. Research conducted in rural communities in India showed that adolescent  
369 girls often had to travel long distances to access markets with diverse food options, affecting their  
370 dietary diversity and nutritional intake (30). Families with limited income may struggle to afford  
371 a balanced and nutritious diet. Adolescent girls from low-income households may rely on cheaper,  
372 energy-dense foods that lack essential nutrients (30). Statistics from research by Maehara M. et al.  
373 in Indonesia indicate that adolescents from lower socioeconomic backgrounds are more likely to  
374 consume diets with lower nutrient content due to financial constraints. Fluctuations in food prices  
375 and inflation can impact the affordability of nutritious foods. Rising food prices can limit the  
376 purchasing power of families and result in compromised nutritional choices (31). A study  
377 conducted during periods of inflation found that families faced challenges in affording nutrient-  
378 rich foods, leading to a shift towards less expensive but less nutritious alternatives (32). Adolescent  
379 girls may have limited control over household food distribution. In some cases, they might receive  
380 smaller portions or less nutritious foods compared to other family members (32). Anecdotal  
381 evidence from certain communities in African regions suggests that adolescent girls often face  
382 unequal food distribution within households, impacting their nutritional intake (32). The Food and  
383 Agriculture Organization (FAO) estimates that over 9% of the global population, including  
384 adolescents, suffers from chronic undernourishment, often due to limited access to adequate and  
385 nutritious food (33). According to the World Bank Report 2021, the prevalence of undernutrition  
386 remains high among adolescent girls, particularly in low- and middle-income countries with

387 limited access to food and nutrition resources (34). UNICEF reports that more than 200 million  
388 children and adolescents under the age of 18 suffer from stunted growth due to chronic  
389 undernutrition, often caused by inadequate access to nutritious food (35). The World Food  
390 Programme (WFP) highlights that women and girls are disproportionately affected by food  
391 insecurity, with an estimated 60% of the world's chronically hungry people being women and girls  
392 (36).

## 393 **Discussion**

394 Our systematic review comprehensively explores the diverse determinants impacting the  
395 nutritional status of adolescent girls. Across socioeconomic, dietary, cultural, educational,  
396 reproductive, healthcare, and access-related domains, we've unveiled critical insights into the  
397 complex issue of adolescent malnutrition.

398 SES emerges as a pivotal factor, influencing nutritional outcomes through income, education, and  
399 resource availability (3, 4). Effective interventions must encompass economic empowerment,  
400 educational enhancements, and improved healthcare access to promote optimal nutritional health.

401 Dietary patterns wield significant influence, with unhealthy snacking, insufficient fruit and  
402 vegetable intake, and reliance on fast food contributing to malnutrition. Tailored strategies such as  
403 educational initiatives and policy measures are vital to promote healthier eating habits (7).

404 Cultural and social norms play a substantial role in dietary behaviors. Crafting approaches that  
405 integrate cultural context while promoting nutritional awareness is key to addressing malnutrition  
406 sensitively and effectively (10).

407 Education stands out as a powerful determinant, empowering adolescent girls to make informed  
408 dietary choices. Integrating nutrition education into schools equips them with essential knowledge  
409 for healthier lives (12).

410 Early marriage and pregnancy pose unique challenges, demanding interventions prioritizing  
411 health, education, and agency for young mothers to ensure proper nutrition (22).

412 Access to healthcare services emerges as a critical factor. Strengthening healthcare infrastructure  
413 and encouraging healthcare utilization are vital for ensuring nutritional well-being through  
414 preventive measures and education (28).

415 Equitable food access is foundational to combating malnutrition. Strategies targeting affordability,  
416 availability, and safety net implementations are essential for promoting optimal nutritional health  
417 among adolescent girls.

418 **Strengths:**

419 1. Comprehensive Insight: The statement highlights the strength of systematic reviews in providing  
420 a holistic understanding of the factors influencing adolescent girls' nutritional health.

421 2. Emphasis on Tailored Interventions: Recognizes the importance of personalized interventions  
422 to address the diverse determinants of nutritional health.

423 3. Empowerment Focus: Acknowledges the potential for interventions to empower adolescent girls  
424 by providing knowledge and resources.

425 **Limitations:**

426 1. Lack of Specifics: The statement lacks specific findings or data from the review, making it less  
427 informative.

428 2. Vagueness in "Tailored Interventions": Does not provide examples or details on what tailored  
429 interventions might involve.

430 3. Limited Scope: The statement lacks information on the review's scope, making it challenging to  
431 assess relevance.

432 4. Lack of Cited Evidence: This could be strengthened by citing specific studies or evidence from  
433 the systematic review for credibility.

434 In summary, our systematic review underscores the intricate interplay of factors influencing  
435 adolescent girls' nutritional health. Tailored interventions addressing these determinants offer the  
436 promise of empowering them with the resources and knowledge needed to achieve and maintain  
437 optimal nutritional well-being.

#### 438 **Conclusion**

439 The canvas of this systematic review paints a vivid portrait of malnutrition among adolescent girls,  
440 revealing its multifaceted composition. The determinants underpinning this complex challenge  
441 intersect across social, economic, cultural, and individual realms. A panoramic vantage unveils the  
442 profound nexus of factors influencing nutritional well-being.

443 The battle against malnutrition necessitates a holistic front, transcending the mere enhancement of  
444 dietary provisions. Instead, it beckons a comprehensive strategy embracing educational  
445 enrichment, gender parity, and unfettered healthcare access. Policymakers, in tandem with  
446 healthcare professionals and local communities, must forge a collective symphony of concerted  
447 efforts. Collaborative interventions stand as the fulcrum of change, fostering awareness campaigns  
448 that illuminate the path of nutritional enlightenment, bolstering economic empowerment, and  
449 dismantling barriers to healthcare access.

450 In the harmonious orchestration of these multifarious endeavors, the seeds of transformation are  
451 sown. Through these united endeavors, malnutrition's grip upon the lives of adolescent girls is  
452 loosened, illuminating a trajectory towards robust development and a luminous, promising future.

453

454 **Disclaimer Statements:**

455 Contributors: None

456 Funding: None

457 Conflict of interest: None

458 Ethics approval: None

459

460

461 **References**

- 462 1. World Health Organization. "Working for a brighter, healthier future: how WHO improves  
463 health and promotes well-being for the world's adolescents." (2021).
- 464 2. Staff U. The State of the World's Children 2011-executive summary: Adolescence an age  
465 of opportunity: Unicef; 2011.
- 466 3. Igbokwe, Obianuju, et al. "Socio-demographic determinants of malnutrition among  
467 primary school aged children in Enugu, Nigeria." *Pan African Medical Journal* 28.1  
468 (2017).
- 469 4. Babar, Nabeela Fazal, et al. "Impact of socioeconomic factors on nutritional status in  
470 primary school children." *Journal of Ayub Medical College Abbottabad* 22.4 (2010): 15-  
471 18.
- 472 5. Christian, Parul, and Emily R. Smith. "Adolescent undernutrition: global burden,  
473 physiology, and nutritional risks." *Annals of Nutrition and Metabolism* 72.4 (2018): 316-  
474 328.
- 475 6. World Health Organization (WHO). (2020). Adolescent Nutrition: A Review of the  
476 Situation in Selected South-East Asian Countries. Retrieved from  
477 <https://apps.who.int/iris/bitstream/handle/10665/337238/9789290228157-eng.pdf>
- 478 7. Narayan, Jitendra, Denny John, and Nirupama Ramadas. "Malnutrition in India: status and  
479 government initiatives." *Journal of public health policy* 40 (2019): 126-141.
- 480 8. United Nations Children's Fund (UNICEF). (2020). Socioeconomic Status and Health: A  
481 New Perspective. Retrieved from [https://data.unicef.org/resources/socioeconomic-status-  
482 and-health/](https://data.unicef.org/resources/socioeconomic-status-and-health/)

- 483 9. Akseer N, Al-Gashm S, Mehta S, Mokdad A, Bhutta ZA. Global and regional trends in the  
484 nutritional status of young people: a critical and neglected age group. *Annals of the New*  
485 *York Academy of Sciences*. 2017;1393(1):3-20.
- 486 10. Caleyachetty, Rishi, et al. "The double burden of malnutrition among adolescents: analysis  
487 of data from the Global School-Based Student Health and Health Behavior in School-Aged  
488 Children surveys in 57 low-and middle-income countries." *The American journal of*  
489 *clinical nutrition* 108.2 (2018): 414-424.
- 490 11. Keats EC, Rappaport AI, Shah S, Oh C, Jain R, Bhutta ZA. The dietary intake and practices  
491 of adolescent girls in low-and middle-income countries: a systematic review. *Nutrients*.  
492 2018;10(12):1978.
- 493 12. Ahmad S, Shukla NK, Singh JV, Shukla R, Shukla M. Double burden of malnutrition  
494 among school-going adolescent girls in North India: A cross-sectional study. *Journal of*  
495 *family medicine and primary care*. 2018;7(6):1417.
- 496 13. Kurz KM, Johnson-Welch C. The nutrition and lives of adolescents in developing  
497 countries: findings from the nutrition of adolescent girls research program. *International*  
498 *Center for Research on Women ICRW Reports and Publications*. 1994:1.
- 499 14. Gupta A, Noronha JA, Garg M. Dietary intake of macronutrients and micronutrients among  
500 adolescent girls: A cross sectional study. *Clinical Epidemiology and Global Health*.  
501 2018;6(4):192-7.
- 502 15. Ashoori M, Omidvar N, Eini-Zinab H, et al. Food and nutrition literacy status and its  
503 correlates in Iranian senior high-school students. *BMC Nutr*. 2021;7(1):19. Published 2021  
504 Jun 4. doi:10.1186/s40795-021-00426-2.



- 505 16. Roseman MG, Riddell MC, Haynes JN. A content analysis of kindergarten-12th grade  
506 school-based nutrition interventions: taking advantage of past learning. *Journal of nutrition*  
507 *education and behavior*. 2011;43(1):2-18.
- 508 17. Neuenschwander LM, Abbott A, Mobley AR. Comparison of a web-based vs in-person  
509 nutrition education program for low-income adults. *Journal of the Academy of Nutrition*  
510 *and Dietetics*. 2013;113(1):120-6.
- 511 18. Lenfant C. Improving the health of America's youth: the NHLBI perspective. *Journal of*  
512 *Health Education*. 1995;26(sup2):6-8.
- 513 19. Best C, Neufingerl N, Van Geel L, van den Briel T, Osendarp S. The nutritional status of  
514 school-aged children: why should we care? *Food and nutrition bulletin*. 2010;31(3):400-  
515 17.
- 516 20. Melaku Y, Dirar A, Feyissa GT, Tamiru D. Optimal dietary practices and nutritional  
517 knowledge of school adolescent girls in Jimma Town, South West Ethiopia. *International*  
518 *Journal of Adolescence and Youth*. 2018;23(3):299-307.
- 519 21. World Health Organization (WHO). (2021). *Nutrition for Adolescents: A Guide to Good*  
520 *Practices*. Retrieved from [https://www.who.int/publications/i/item/nutrition-for-](https://www.who.int/publications/i/item/nutrition-for-adolescents-a-guide-to-good-practices)  
521 [adolescents-a-guide-to-good-practices](https://www.who.int/publications/i/item/nutrition-for-adolescents-a-guide-to-good-practices)
- 522 22. Tetanus W. *Integrated Management Of Pregnancy And Childbirth. Standards For Maternal*  
523 *And Neonatal Care Developed By The Department Of Making Pregnancy Safer Geneva:*  
524 *World Health Organization*. 2006.
- 525 23. Ismail A, Darling AM, Mosha D, Fawzi W, Sudfeld C, Sando MM, Abdallah Noor R,  
526 Charles J, Vuai S. Prevalence and risk factors associated with malnutrition among

- 527 adolescents in rural Tanzania. *Trop Med Int Health*. 2020 Jan;25(1):89-100. doi:  
528 10.1111/tmi.13331. Epub 2019 Nov 20. PMID: 31693787.
- 529 24. Gennari, Pamela J. "Adolescent Pregnancy in Developing Countries." *International*  
530 *Journal of Childbirth Education* 28.1 (2013).
- 531 25. Ahinkorah, Bright Opoku, et al. "Prevalence of first adolescent pregnancy and its  
532 associated factors in sub-Saharan Africa: A multi-country analysis." *PLoS One* 16.2  
533 (2021): e0246308.
- 534 26. Blum RW, Gates WH. *Girlhood, not motherhood: preventing adolescent pregnancy:*  
535 *United Nations Population Fund (UNFPA); 2015.*
- 536 27. Dempsey, Amanda F., et al. "Adolescent preventive health care: what do parents  
537 want?." *The Journal of pediatrics* 155.5 (2009): 689-694.
- 538 28. World Health Organization (WHO). (2015). *Adolescent Pregnancy: Fact Sheet*. Retrieved  
539 from <https://www.who.int/news-room/fact-sheets/detail/adolescent-pregnancy>
- 540 29. Bhutta, Z. A., Das, J. K., Rizvi, A., Gaffey, M. F., Walker, N., Horton, S., ... & Lancet  
541 Nutrition Interventions Review Group, & the Maternal and Child Nutrition Study Group.  
542 (2013). Evidence-based interventions for improvement of maternal and child nutrition:  
543 what can be done and at what cost?. *The Lancet*, 382(9890), 452-477.
- 544 30. Narayan J, John D, Ramadas N. Malnutrition in India: status and government initiatives.  
545 *Journal of public health policy*. 2019;40(1):126-41.
- 546 31. Maehara M, Rah JH, Roshita A, Suryantan J, Rachmadewi A, Izwardy D. Patterns and risk  
547 factors of double burden of malnutrition among adolescent girls and boys in  
548 Indonesia. *PLoS One*. 2019;14(8):e0221273. Published 2019 Aug 20.  
549 doi:10.1371/journal.pone.0221273.

- 550 32. Organization WH. The health of the people: what works-the african regional health report  
551 2014: health statistics2014. p. 26-.
- 552 33. Food and Agriculture Organization (FAO). (2020). The State of Food Security and  
553 Nutrition in the World. Retrieved from <http://www.fao.org/3/ca9692en/ca9692en.pdf>
- 554 34. The World Bank. (2021). Poverty & Equity Data. Retrieved from  
555 <https://povertydata.worldbank.org/>
- 556 35. United Nations Children's Fund (UNICEF). (2021). The State of the World's Children  
557 2021. Retrieved from <https://www.unicef.org/reports/state-of-worlds-children-2021>
- 558 36. World Food Programme (WFP). (2021). Hunger Map 2021. Retrieved from  
559 <https://cdn.wfp.org/2021/hunger-map/index.html>
- 560 37. [https://www.ohri.ca/programs/clinical\\_epidemiology/nosgen.pdf](https://www.ohri.ca/programs/clinical_epidemiology/nosgen.pdf)

561

562  
563  
564  
565  
566  
567  
568  
569  
570  
571  
572  
573  
574  
575  
576  
577  
578  
579  
580  
581  
582  
583  
584  
585  
586  
587  
588  
589  
590  
591

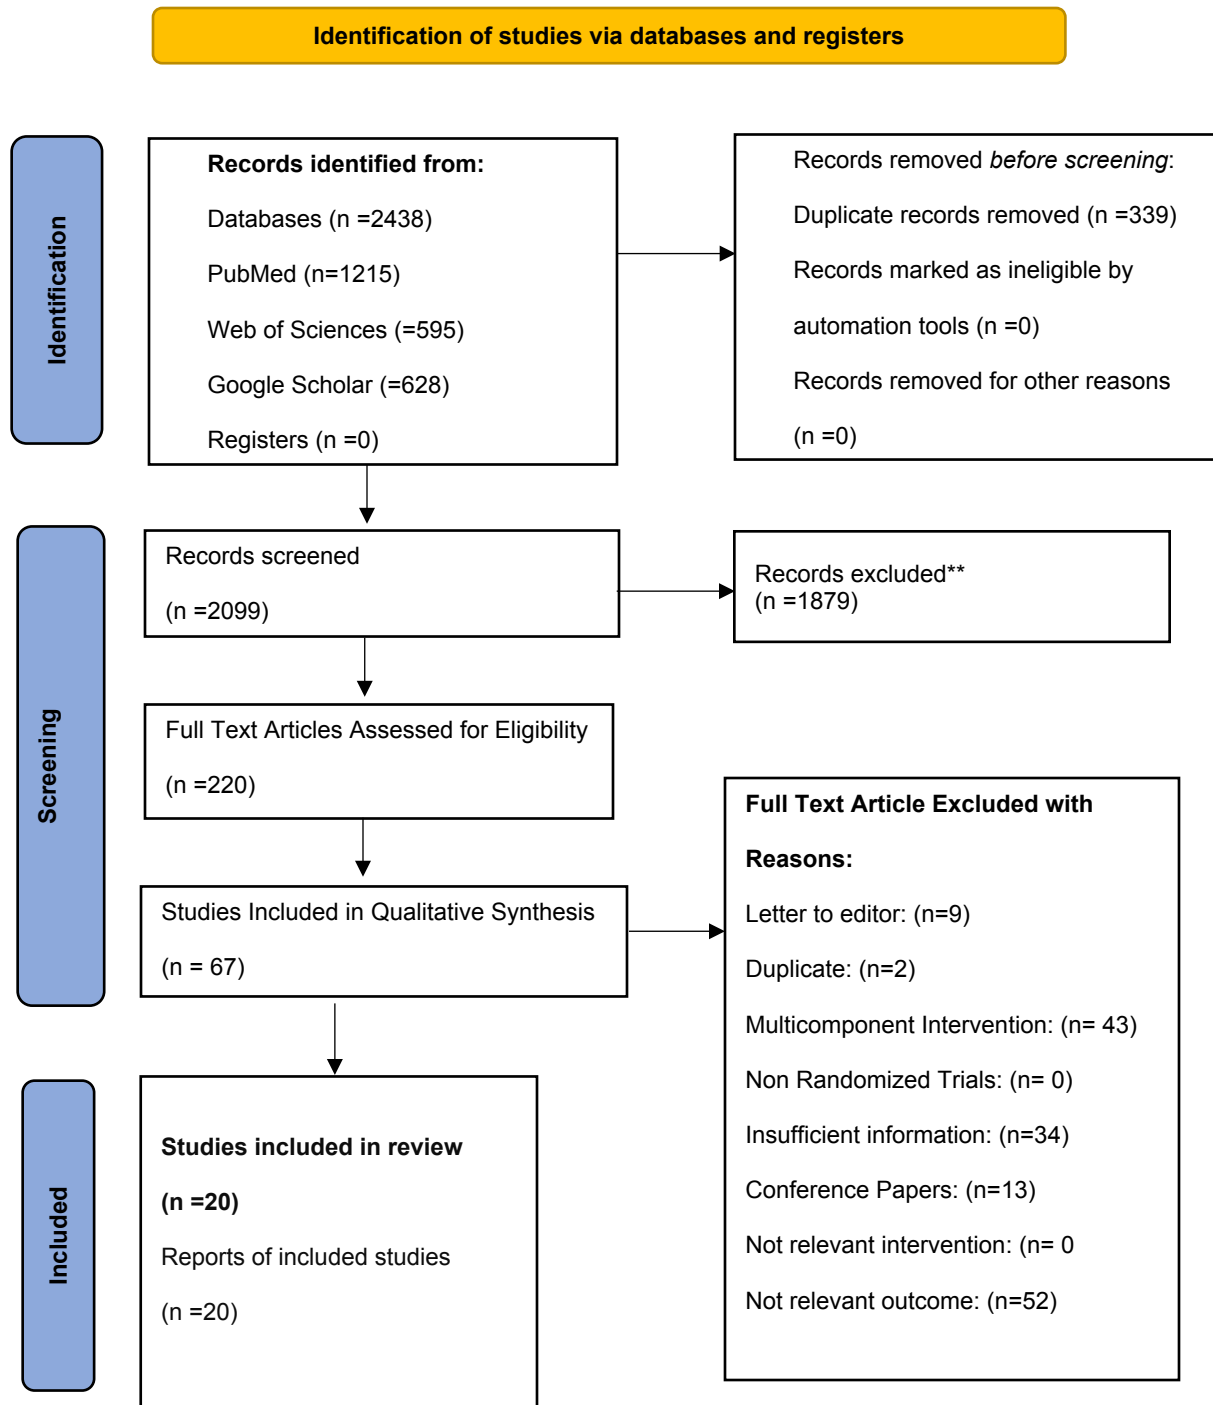

**Figure 1.** PRISMA 2020 flow diagram for new systematic reviews which included searches of databases, registers, and other sources.
